# Supplementary material
Source: PubMed Central journal article supplement (PMC395783)

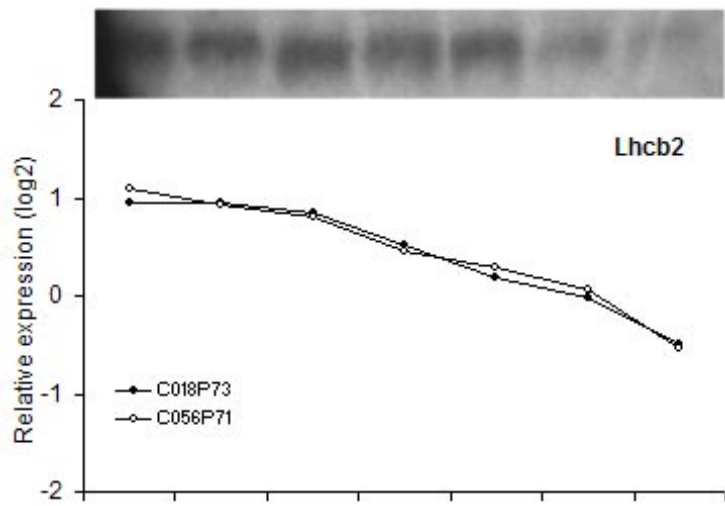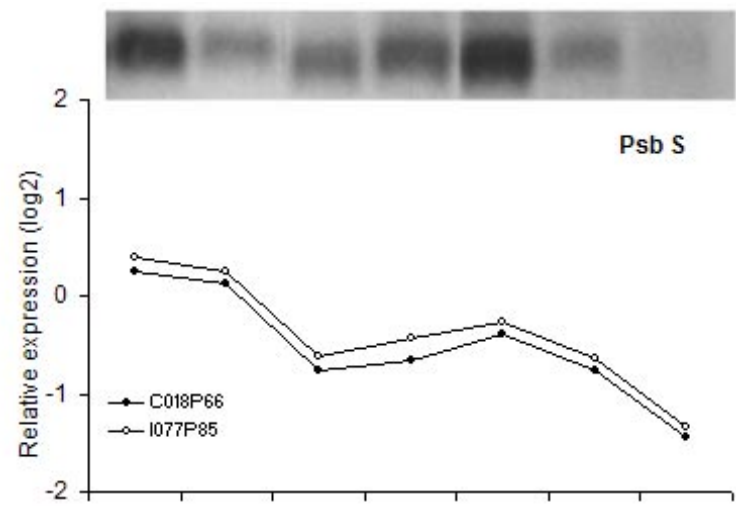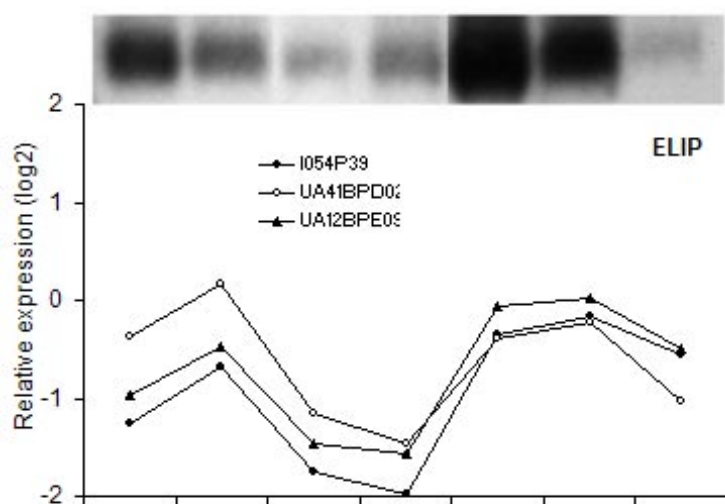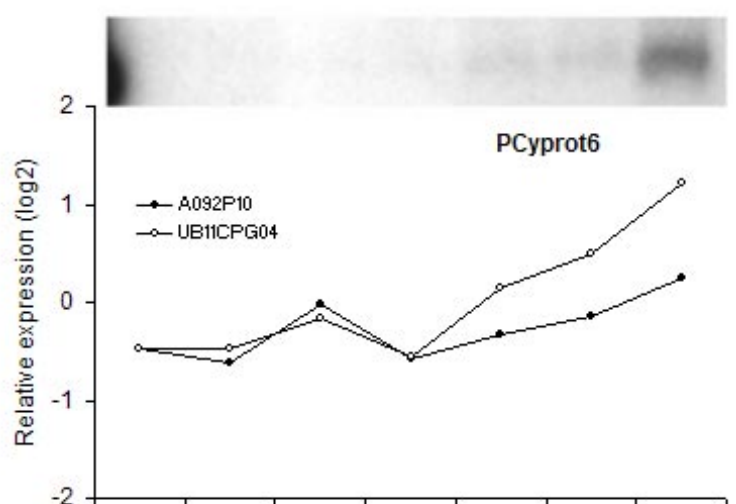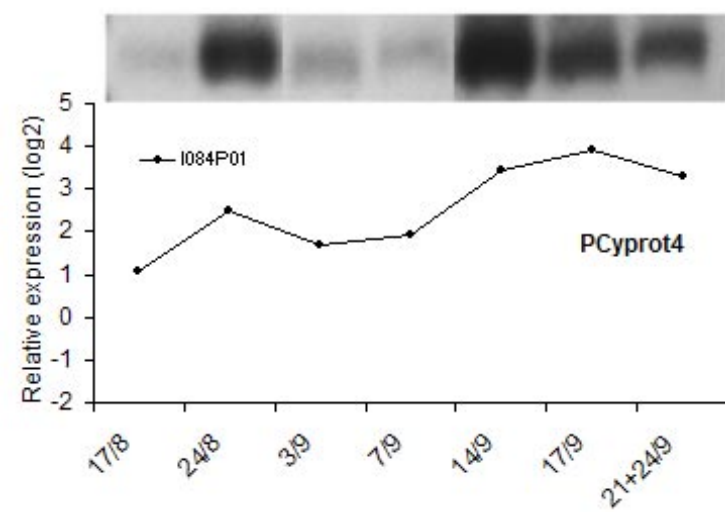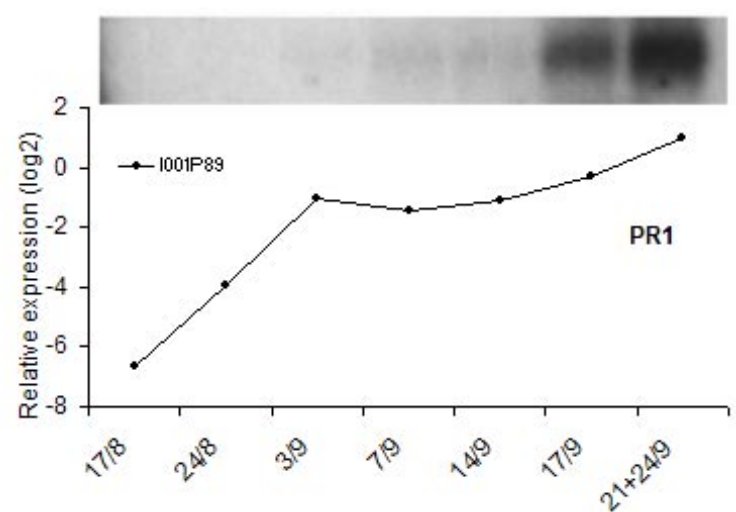

Supplement: gb-2004-5-4-r24-s1.pdf [file gb-2004-5-4-r24-s1.pdf]

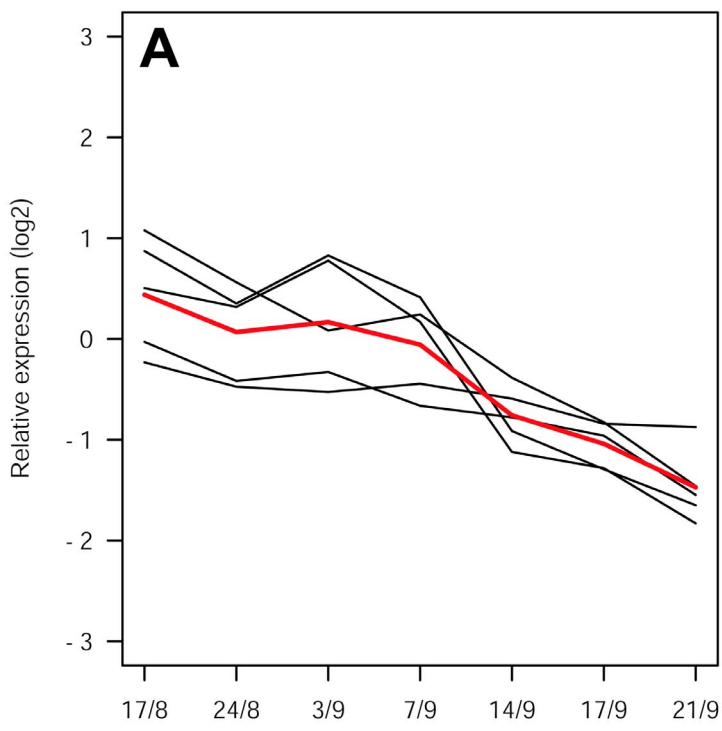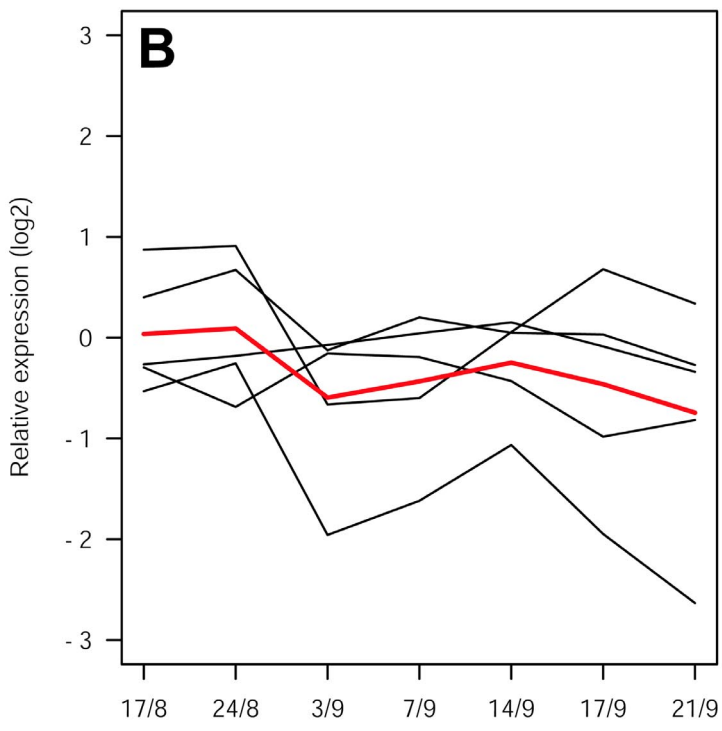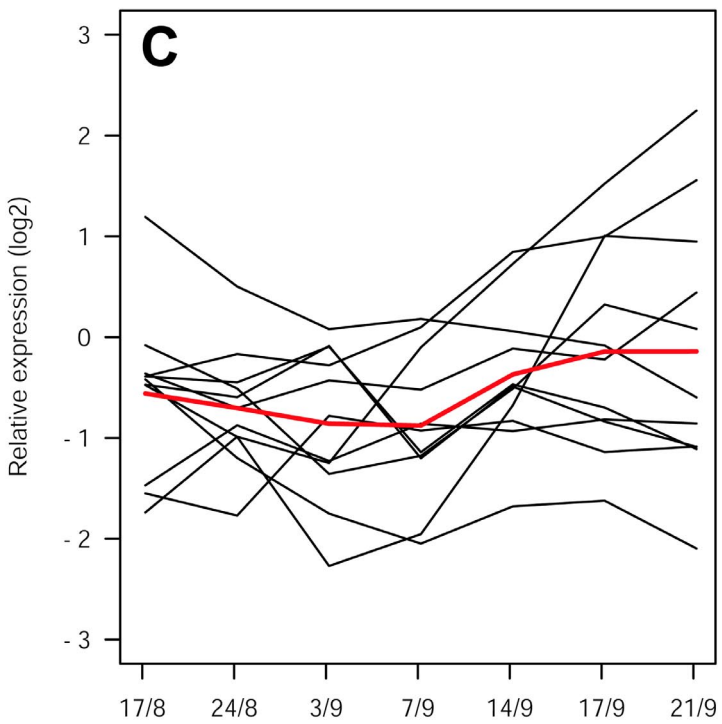

Supplement: gb-2004-5-4-r24-s2.pdf [file gb-2004-5-4-r24-s2.pdf]

Relative expression (log2)

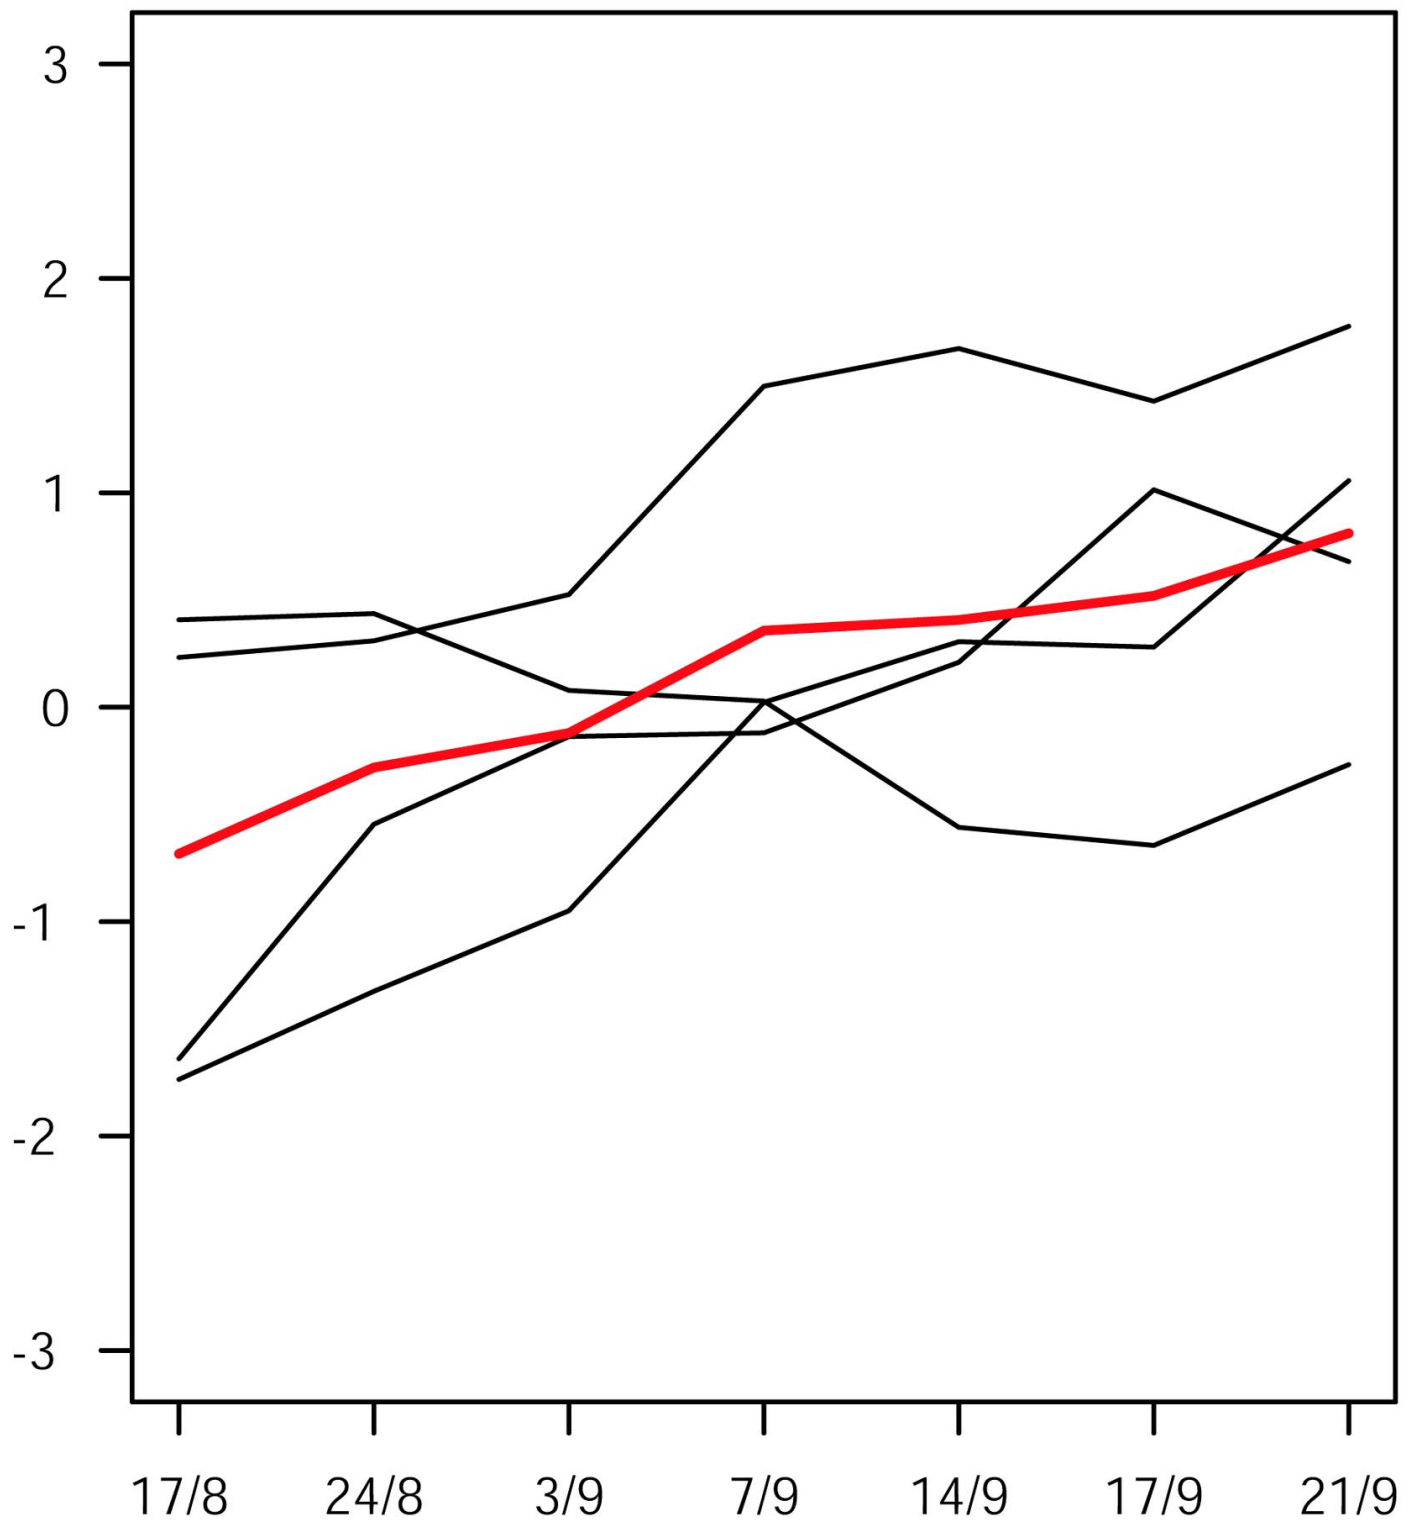

Supplement: gb-2004-5-4-r24-s3.pdf [file gb-2004-5-4-r24-s3.pdf]
